*Original Article*

# Meta-analysis of genotype–phenotype correlation in X-linked Alport syndrome: impact on clinical counselling

Oliver Gross, Kai-Olaf Netzer, Romy Lambrecht, Stefan Seibold and Manfred Weber

Medical Clinic I, Cologne City Hospital, Cologne-Merheim, Germany

## Abstract

**Background.** Alport syndrome (AS) is a hereditary nephropathy characterized by progressive renal failure, hearing loss and ocular lesions. Numerous mutations of the COL4A5 gene encoding the  $\alpha 5$ -chain of type IV collagen have been described, establishing the molecular cause of AS. The goal of the present study was to identify the genotype–phenotype correlations that are helpful in clinical counseling. COL4A5-mutations ( $n=267$ ) in males were analysed including 23 German Alport families.

**Methods.** Exons of the COL4A5 gene were PCR-amplified and screened by Southern blot, direct sequencing or denaturing gradient gel electrophoresis. Phenotypes were obtained by questionnaires or extracted from 44 publications in the literature. Data were analysed by Kaplan–Meier statistics,  $\chi^2$  and Kruskal–Wallis tests.

**Results.** Genotype–phenotype data for 23 German Alport families are reported. Analysis of these data and of mutations published in the literature showed the type of mutation being a significant predictor of end-stage renal failure (ESRF) age. The patients' renal phenotypes could be grouped into three cohorts: (1) large rearrangements, frame shift, nonsense, and splice donor mutations had a mean ESRF age of  $19.8 \pm 5.7$  years; (2) non-glycine- or 3' glycine-missense mutations, in-frame deletions/insertions and splice acceptor mutations had a mean ESRF age of  $25.7 \pm 7.2$  years and fewer extrarenal symptoms; (3) 5' glycine substitutions had an even later onset of ESRF at  $30.1 \pm 7.2$  years. Glycine-substitutions occurred less commonly *de novo* than all other mutations (5.5% vs 13.9%). However, due to the evolutionary advantage of their moderate phenotype, they were the most common mutations. The intrafamilial phenotype of an individual mutation was found to be very consistent with

regards to the manifestation of deafness, lenticonus and the time point of onset of ESRF.

**Conclusions.** Knowledge of the mutation adds significant information about the progress of renal and extrarenal disease in males with X-linked AS. We suggest that the considerable prognostic relevance of a patient's genotype should be included in the classification of the Alport phenotype.

**Keywords:** Alport syndrome; genetic counseling; genotype–phenotype correlation; hereditary nephropathy; type IV collagen

## Introduction

Alport syndrome (AS) is a hereditary nephropathy characterized by family history of haematuria, progressive renal failure, sensori-neural deafness and typical ocular changes [1,2]. The disease is caused by mutations in type IV collagen genes. Type IV collagen is a major constituent of basement membranes [3,4]. Six genetically distinct  $\alpha(IV)$ -chains ( $\alpha 1$ – $\alpha 6$ ) have been identified, the corresponding genes of which are located pairwise on chromosomes X, 2, and 13. Each  $\alpha(IV)$ -chain contains a C-terminal NC1-domain, a collagenous domain of Gly-X-Y repeats that form the triple-helix structure, and an N-terminal 7S-domain. While the  $\alpha 1$ - and  $\alpha 2$ -chains are ubiquitously found in basement membranes, the  $\alpha 3$ -,  $\alpha 4$ - and  $\alpha 5(IV)$ -chains show a restricted distribution and are specifically expressed in the glomerulus, inner ear, and eye [4]. There is evidence that mutations of COL4A5 alter or abolish expression of the  $\alpha 5(IV)$ -chain. This in turn leads to an abnormal basement membrane with decreased or absent  $\alpha 3$ - and  $\alpha 4$ -chains. How this initiates progressive nephritis and scarring observed in AS is not well understood.

To date, more than 300 mutations of all types have been described in the COL4A5-gene [3,5–47]. Valid statistical analysis of the genotype–phenotype relation

Correspondence and offprint requests to: Dr Oliver Gross, Medical Clinic I, Merheim Medical Centre, Ostmerheimer Strasse 200, D-51109 Köln, Germany. Email: oliver.gross@uni-koeln.de

has been hampered by a rather variable Alport phenotype and a limited number of mutations reported in individual publications. The aim of this study therefore was to elucidate genotype–phenotype correlations in a review of all COL4A5 mutation studies available in the literature. We evaluated 256 mutations from 44 publications, which provided basic phenotypic information, including 12 mutations from our group. Furthermore, genotype–phenotype data of 11 German Alport patients with previously unpublished mutations were included into the analysis. We found the progression rate of renal disease and hence the age of end-stage renal failure (ESRF) were influenced by the type of the underlying mutation. In the cohort with the most severe mutations, which either abolished protein expression or led to truncated protein chains, patients reached ESRF at the age of 20 years. In contrast, the cohort with least severe mutations reached ESRF at about 30 years of age. The results illustrate the usefulness of molecular genetic testing in Alport syndrome as well as the need for high throughput DNA analysis in the future.

## Methods

### *German Alport families*

Patients' data were obtained by standardized questionnaires from cooperating centres in Germany, Austria and Switzerland. Data included family history, haematuria, proteinuria, ESRF, kidney-transplants, ocular changes, deafness, hypertension, and additional symptoms (macrothrombocytopenia and leiomyomatosis). Ocular changes (lenticonus anterior or posterior) were evaluated by consultation of ophthalmologists, sensori–neural deafness was documented by consultation of ENT-specialists. Data from more than 200 male Alport-patients were obtained. The diagnosis of AS was defined as being likely when two of the following four criteria were fulfilled: (i) sensori–neural deafness; (ii) typical ocular changes; (iii) positive family history for haematuria; and (iv) typical histological changes of the glomerular basement membrane. One-hundred-and-four unrelated families were selected in which at least two of these four criteria were fulfilled, and screened for molecular changes of the COL4A5 gene.

### *DNA analysis*

Genomic DNA was isolated from peripheral blood lymphocytes and Southern blot analysis was performed as described [6]. PCR amplification was performed in a total volume of 50 µl, using DNA 100 ng, 20 pM of each primer, MgCl<sub>2</sub> 2 mM, dNTP 0.2 mM and Taq Polymerase 1 U (Promega, Mannheim, Germany). Positions of primers for each exon are shown in Table 1. Primers marked 'Ps' contained a psoralen derivative for photo crosslinking prior denaturing gradient gel electrophoresis (DGGE) analysis [48]. PCR products were purified through filter columns (Mobitech, Göttingen, Germany) and sequenced on an ABI sequencer 373 using the PRISM dye deoxy terminator cycle sequencing kit.

For screening by DGGE, samples of two separate patients were mixed at 95°C, cooled down to 55°C, photo-crosslinked

and loaded on a 6.8% polyacrylamide gel containing a linear gradient of denaturants (100% being equivalent to 40% formamide and 7 M urea) [48]. The gel was run in 1×TAE buffer (Tris 40 mM, EDTA 1 mM, pH 8.0) at 120 V/h at a temperature of 60°C. DNA was visualized by silver staining (BioRad). When abnormal band-shifts were found, PCR and DGGE were repeated to exclude artifacts. Corresponding PCR products were purified and sequenced on an ABI sequencer as described above.

### *Selection of data from the literature*

Data on more than 300 mutations were retrieved from 44 publications [3,5–47]. Mutations were excluded when data regarding two or more of the following markers were absent: hearing loss, ocular changes, family history, and changes in the glomerular basement membrane. By this process, 256 mutations could be included in this study.

### *Statistics*

Data were analysed by  $\chi^2$  tests and two-way ANOVA. Data were stratified according to the type of mutation: 5' glycine substitutions (class 1), 3' glycine substitutions (class 2), in-frame mutations (class 3), splice donor mutations (class 4), splice acceptor mutations (class 5), frameshift and premature stop mutations (class 6), and large rearrangements (class 7). Data were then analysed by Kaplan–Meier statistics.

## Results

### *Novel COL4A5 mutations*

Twenty-three mutations were found in German families (30 exons screened) (Table 2). No particular hot spot was identified, and the mutations were unique to the respective families. Missense mutations comprised the largest fraction in the German study cohort (35%), followed by splice site mutations (26%) and small deletions/insertions (22%). Nonsense mutations and large rearrangements each accounted for 9%. In three out of 21 cases mutations occurred in patients with negative family history. Molecular analyses of family members proved that two of these mutations had occurred *de novo*.

### *Phenotypes in the German study cohort*

Family history was positive in 18/21 patients (Table 2). The biopsy rate for the whole study cohort was 53%, which is well within the range reported in the literature (44–57%). In families with identified mutations, biopsy rate was not significantly different at 56% (13/21). Average age at onset of ESRF was 25 years, while six patients had not reached ESRF. When stratified according to mutation types (Table 2), mean ESRF ages were 29, 27, 17, 17 and 23 years, respectively, suggesting an impact of the mutation type on the renal outcome. The same stratification did not reveal any differences with regard to hearing loss, which was almost always present. Ocular lesions, however,

**Table 1.** Primers used for direct sequencing or denaturing gradient gel electrophoresis

| Exon     | Forward primer |                        | Reverse primer |                         |
|----------|----------------|------------------------|----------------|-------------------------|
| 7/8      | 7A             | GTTTCTTGTTTCCTCCATGCTC | 8B-Ps          | CAAAACATTTGGTTCCCCCAG   |
| 11/12/13 | 11A            | AATACTATTTTGATGGGC     | R13B2          | GCAAGATTTTCATTGACTTCC   |
| 14/15    | 14A            | CTCCAGCTCTAACCATGTTG   | R15B           | CATTATAATGTCAGTAGTGATAT |
| 16       | 16A-1          | AGCTTGTTATATTCTTTAACT  | R16B           | TTTTTGTCATACTGCTTCTCT   |
| 29       | 29A            | GGACAGAAAAGTCATGGGA    | 29B-Ps         | CTTATCACCCATAAACTTTCC   |
| 30       | 30A            | CCAAGGACTAGTGACTCAG    | 30B-Ps         | GTGCTACAAAATGCACATTTA   |
| 31       | 31A            | CTTAGGTCTGTTATCTACAGG  | 31B-Ps         | CCTTAATCCAAATCAGAGAAAA  |
| 32       | 32A            | CCAACCTCAATAGTTTTCTG   | 32B-Ps         | CCTCTCATACAGTCTGG       |
| 33       | 33A            | GCATTAATCTTTGATGGA     | 33B-Ps         | CTTCAGATATATCAGGAA      |
| 34       | 34A-Ps         | TGAGTAGCTTGCTTTGCC     | R34B           | TTCAGTGTCAGCTAAGCA      |
| 35       | 35A-Ps         | CCATGAAACCAGACAACCC    | 35B            | CCTTTCATTAATGGGACT      |
| 36       | 36A-Ps         | CTAACTCAGAGTTTGCGGAG   | 36B            | ATTTTCATATCTGCTCAAG     |
| 38       | 38A            | GTAAGTTTGAATTGTAGCTC   | R38B-Ps        | ATGTTTCACAGCTGAACATGAT  |
| 39       | 39A-Ps         | AAGAAGGGAGCATATGGAAG   | R39B           | GTAAATTCAACACAGAG       |
| 40       | 40A-Ps         | CAGTTGTATTATCCACTTGAG  | 40B            | GGTGGAGATGGAAAAATAG     |
| 41       | 41A-Ps         | TTCTGTAACCTCGGTATTA    | R41B           | GACTGAATAACCTGCCAG      |
| 42       | 42A-Ps         | GCCTGACTTTTATGCTACT    | R42B Eco       | CTTCTCTCATCAGATATC      |
| 43/44    | 43A            | CCACTATGTAATTCCTATGCC  | R44B           | TAGCCTCCGATGGTCTGG      |
| 45       | 45A-Ps         | GGCTTCCATTTCTTGTAAACC  | R45B           | CTGTACATTCTGCACATGTATC  |
| 46       | 46A-Ps         | TTCTACTCATATTGAATGC    | R46B           | TGTCCAGAGGTCTCTCAG      |
| 47       | 47A-Ps         | GAGTGGATCAGAGCTTACT    | R47B           | GAACCCAACAGGATTTCTGA    |
| 48       | 48A            | CACGCAGTCCTTTACTGTTT   | R48B-1-Ps      | TCTGACTAGCTAACTAACTGG   |
| 49       | 49A            | GTAGATTATGTTCTTCTCTCT  | R49B-1-Ps      | CTATGATGACAAATGCAAGGA   |
| 50       | 50A            | TATGGCACATGGGTATTGCG   | 50B-Ps2        | CATCTCTGAAGGAAGCTTTG    |
| 51       | 51A-Ps         | TGTGGATCTGATTGTCTTA    | R51B           | AACACAAAAGGAATTCTTCAA   |

(Ps stands for Psoralen).

**Table 2.** Mutations identified in the German Alport study cohort

| Patient number      | Mutation               | Nucleotide position    | Exon | Family history | Biopsy | Hearing loss | Ocular lesions | ESRF type and onset (years) |
|---------------------|------------------------|------------------------|------|----------------|--------|--------------|----------------|-----------------------------|
| Missense            |                        |                        |      |                |        |              |                |                             |
| DE-014              | Gly129→Val*            | G588→T                 | 7    | +              | +      | +            | —              | J (29)                      |
| DE-044              | Gly204→Asp             | G813→A                 | 11   | +              | nd     | +            | +              | J (26)                      |
| DE-005              | Gly292→Val*            | G1077→T                | 15   | +              | nd     | +            | —              | J (15)                      |
| DE-034              | Gly307→Asp             | G1122→A                | 16   | +              | +      | +            | —              | A (43)                      |
| DE-232              | Arg1563→Gln            | G4890→A                | 48   | +              | +      | +            | —              | no (26)                     |
| DE-125              | Tyr1597→Cys*           | A4992→G                | 49   | nd             | +      | —            | —              | A (31)                      |
| DE-237              | Cys1681→Tyr*           | G5244→A                | 51   | +              | nd     | +            | +              | A (31)                      |
| DE-311              | Cys1678→Arg            | T5234→C                | 51   | +              | nd     | +            | nd             | no (12)                     |
| Nonsense            |                        |                        |      |                |        |              |                |                             |
| DE-024              | Gln 287→Stop*          | G1061→T                | 15   | +              | +      | +            | +              | J (17)                      |
| DE-216              | Arg1674→Stop*          | C5222→T                | 51   | +              | +      | +            | —              | no (20)                     |
| Splice site         |                        |                        |      |                |        |              |                |                             |
| DE-007              | AgGGT→ggGGt*           | a1094–2→g              | 16   | +              | +      | +            | —              | A (39)                      |
| DE-006              | CTTgtaagt→CTT ... gt*  | del gtaa1234 + 1,2,3,4 | 18   | nd             | nd     | +            | nd             | J (28)                      |
| DE-030              | TAGgt→TAGct*           | g3656 + 1→c            | 38   | +              | +      | +            | —              | J (16)                      |
| DE-116              | CTGgt→CTGga            | t3896 + 2→a            | 40   | +              | +      | nd           | nd             | no (5)                      |
| DE-192              | AgGCC→tgGCC            | a3807–2→g              | 41   | +              | +      | +            | —              | J (28)                      |
| DE-101              | AgGTC→aaGTC            | g4401–1→a              | 46   | +              | +      | +            | +              | J (25)                      |
| Deletion/insertion  |                        |                        |      |                |        |              |                |                             |
| DE-151              | Pro 140→Frameshift     | del G                  | 7    | —              | nd     | +            | +              | J (17)                      |
| DE-037              | Gly 254→Frameshift*    | del AG                 | 13   | +              | nd     | +            | +              | J (15)                      |
| DE-139              | Pro 271→Frameshift     | del C                  | 14   | +              | +      | +            | —              | no (8)                      |
| DE-031              | Pro865→Pro871→In-frame | del 18 bp A2797–C2814  | 31   | +              | +      | +            | nd             | J (18)                      |
| DE-293              | Pro1399→Frameshift     | ins C                  | 45   | <i>de novo</i> | nd     | +            | —              | no (7)                      |
| Large rearrangement |                        |                        |      |                |        |              |                |                             |
| DE-025              | Deletion exon 2–51*    |                        |      | <i>de novo</i> | nd     | +            | +              | J (21)                      |
| DE-002              | Deletion exon 38–51*   |                        |      | +              | nd     | +            | +              | J (26)                      |

Thirty out of 51 COL4A5 exons were screened. \*Previously published mutations [6,9,46–48]; nd, no data; —, negative; +, positive.

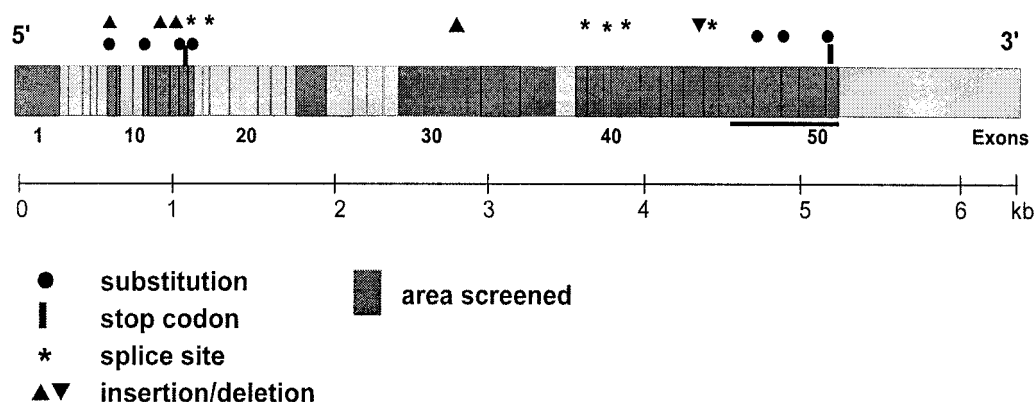

Fig. 1. Distribution of small mutations in 30 out of 51 exons of the COL4A5-gene.

seemed to be more common in patients with large rearrangements and frameshift-causing small deletions/insertions, as compared with all other mutations (57 vs 25%).

#### Analysis of published mutations

In order to perform more valid statistical analyses, 44 publications on AS were screened [3,5–47]. Family history was positive in 84%. All *de novo* mutations in German families were proven to be *de novo* on a molecular basis. In the literature, no information was found concerning how the diagnosis of *de novo* mutations was made. Data regarding onset of ESRF were available in 169 patients, 82% of which suffered from juvenile onset ( $\leq 30$  years of age). Sensori-neural deafness was present in 73% of patients ( $n=235$ ). Data regarding ocular lesions were available in 49 patients, 57% of which had lenticonus anterior.

For genotype-phenotype analyses, mutations were divided into five groups, depending on expected genetic damage: (1) glycine substitution, (2) in-frame and missense (other than glycine), (3) splice site, (4) frameshift and nonsense mutations (including small deletions/insertions) and (5) large rearrangements (Table 3).

#### Large rearrangements

Forty-four large rearrangements were described in the literature. Rearrangements lead to the juvenile type of AS in more than 95% ( $n=27$ ,  $P=0.05$ ). Seventy-seven per cent of patients had sensori-neural deafness. All five patients with sufficient data about ocular lesions had a lenticonus.

#### Missense mutations

Eight single base exchanges were found in German patients (Table 2). Four of these were non-glycine missense mutations resulting in minor changes in the  $\alpha 5(\text{IV})$ -chain within the NC1-domain, and in an adult onset of ESRF (Table 2). Four missense mutations resulted in changes of a glycine residue in the Gly-XY repeat sequences of the collagenous domain.

Glycine-XY mutations led to a highly significant later onset of ESRF (66 vs 90% in the juvenile type of AS,  $n=56$ ,  $P=0.001$ ) (Table 3). The zipper-like folding mechanism of the triple helix of type IV collagen is believed to start from the C-terminal end. In order to evaluate if the distance of the mutation from the C-terminal influences the phenotype, glycine-XY missense mutations ( $n=98$ ) were divided into two groups: (i) location within exon 1–20 of the  $\alpha 5(\text{IV})$ -chain and (ii) location within exon 21–47. Mutations located in exons 1–20 influenced the phenotype in a significantly less severe manner than mutations located in exons 21–47 (55 vs 72% juvenile type of AS,  $n=56$ ,  $P=0.05$ ). Glycine-XY mutations also resulted in lower numbers of ocular changes (25 vs 73%,  $n=16$ ) and hearing loss (69 vs 75%,  $n=90$ ).

*De novo* mutations significantly involved the glycine-XY domain less often than other mutations (5.5 vs 13.9%,  $P=0.05$ ).

#### Nonsense mutations

Two nonsense mutations in German families led to a premature stop codon in exon 15 (DE-024) and 51 (DE-216). All 18 patients with nonsense mutations described in the literature suffered from a juvenile onset of ESRF and a high frequency of hearing loss and ocular lesions (data not significant).

#### Donor and acceptor splice site mutations

Six splice site mutations were found in the German families and 33 in the literature. Donor splice site mutations ( $n=21$ ) led to a high number of juvenile ESRF cases (94%), hearing loss (86%) and ocular lesions (80%). Acceptor splice site mutations ( $n=18$ ) resulted in a significantly lower number of juvenile cases of AS (63 vs 94%,  $n=34$ ,  $P=0.05$ ) and hearing impairment (61 vs 86%,  $n=39$ ,  $P=0.05$ ).

#### Small insertions and deletions

An insertion of one C was found in patient DE-293 resulting in a shift of the reading frame. His mother and other family members had a normal DGGE- and

**Table 3.** Correlation between genotype and phenotype according to type and location of mutation

| Patient number | Mutation             | Family history          | Biopsy done | Hearing loss   | Ocular lesions | ESRF juvenile onset |
|----------------|----------------------|-------------------------|-------------|----------------|----------------|---------------------|
| 30             | Gly-XY mutation      |                         |             |                |                |                     |
| 68             | Exon 1–20            | 93%                     | 44%         | 70%            | 2/8 (25%)      | 11/20 (55%)*        |
|                | Exon 21–47           | 92%                     | 67%         | 68%            | 2/8 (25%)      | 26/36 (72%)*        |
|                |                      | $\Sigma$ <i>de novo</i> |             | $\Sigma$ 62/90 | $\Sigma$ 4/16  | $\Sigma$ 37/56      |
|                |                      | 3/55 (5.5%)*            |             | (68.9%)        | (25%)*         | (66.1%)*            |
| 20             | Nonsense             |                         |             |                |                |                     |
|                | –                    | 90%                     | 47%         | 85%            | 4/6 (67%)      | 12/12 (100%)        |
| 21             | Splice site          |                         |             |                |                |                     |
|                | Donor splice site    | 81%                     | 52%         | 86%            | 4/5 (80%)      | 17/18 (94%)         |
| 18             | Acceptor splice site | 83%                     | 60%         | 61%*           | 4/5 (80%)      | 10/16 (63%)*        |
| 9              | In-frame             |                         |             |                |                |                     |
|                | –                    | 67%                     | 44%         | 50%            | nd             | 4/5 (80%)           |
| 25             | Frameshift           |                         |             |                |                |                     |
|                | Exon 1–30            | 76%                     | 38%         | 79%            | 6/10 (60%)     | 18/18 (100%)        |
| 32             | Exon 31–51           | 77%                     | 48%         | 73%            | 1/2 (50%)      | 15/17 (88%)         |
| 44             | Large rearrangement  |                         |             |                |                |                     |
|                | –                    | 77%                     | 52%         | 77%            | 5/5 (100%)     | 26/27 (96%)         |
| $\Sigma$ 267   | Total                |                         |             |                |                |                     |
|                | –                    | 84% <sup>#</sup> *      | 53%         | 171/235 (73%)  | 28/49 (57%)    | 139/169 (82%)       |

244 patients described in the literature were included, plus 23 patients in this study. Young patients below 20 years of age who had not yet reached ESRF were excluded from the last column. nd, no data; \* $P < 0.05$ ; \*\* $P < 0.01$ ; \*\*\* $P < 0.001$  in  $\chi^2$  tests; <sup>#</sup>sum of *de novo* mutations (without Gly-XY) 17/122 (13.9%)\*.

direct sequencing-pattern indicating a *de novo* mutation. Three frameshift mutations and one in-frame mutation (deletion of 18 basepairs in family DE-031) were found. All patients suffered from hearing loss and juvenile onset of ESRF. Four out of five patients with in-frame mutations described in the literature had juvenile onset of ESRF (data not significant). Fifty-three frameshift mutations are described in the literature. As glycine-XY mutations influence the phenotype according to their distance from the C-terminal, frameshift mutations were also divided into two groups: (i) location within exon 1–30 and (ii) location within exon 31–51. No significant differences were found in the frequency of hearing loss ( $n = 53$ ), ocular lesions ( $n = 12$ ) or in onset of ESRF ( $n = 33$ ).

Kaplan–Meier statistics (Figure 2) showed the type of mutation as being a significant predictor of the onset of ESRF ( $P < 0.0001$ ). Splice acceptor and glycine-XY mutations (exons 1–20 and exons 21–47) on their own are significant predictors of the estimated time point of onset of ESRF.

Mutations were separated into three groups, according to their likely effects on protein structure as follows.

- Juvenile type of AS in  $> 90\%$  of patients: large rearrangements, premature stop, frameshift mutations and mutations involving the donor splice site or NC1-domain ( $n = 92$ ) ('truncated protein group').
- Juvenile type of AS in  $\sim 75\%$  of patients: glycine-XY missense mutations of exons 21–47, in-frame

mutations and mutations involving the acceptor splice site ( $n = 57$ ) ('altered protein structure group').

- Juvenile type of AS in  $\sim 50\%$  of patients: glycine-XY mutations involving exons 1–20 ( $n = 20$ ).

In all three groups, numbers of patients reaching ESRF differed significantly between 17 and 37 years of age ( $P = 0.01$ ) as well as the numbers of patients with adult type of AS (truncated protein group: 7.5%; altered protein structure group: 24.6%; glycine-XY mutations of exons 1–20: 45%,  $P = 0.01$ ) (Figure 3). Mean age when reaching ESRF differed significantly (19.8 vs 25.7 vs 30.1 years, respectively,  $P = 0.01$ ). Seventy-five per cent of patients with a truncated  $\alpha$ -chain reached ESRF with the age of 23, whereas only 40% of patients with an altered  $\alpha$ -chain structure and 20% of patients with glycine-XY mutations of exons 1–20 have proceeded to ESRF at the same age ( $P = 0.001$ ). The same tendency (not significant) exists regarding the onset and total number of hearing losses (data not shown).

In order to validate our previous findings, the phenotypic consistency of all affected members of German Alport families with known mutations was evaluated out of a total number of 45 Alport patients in 23 families. All 14 affected patients of eight different families within two different generations had lenticonus. Twenty-one families reported hearing loss; all 38 Alport patients in three different generations were affected. In 13 families two or more affected patients could be analysed for the consistency of the

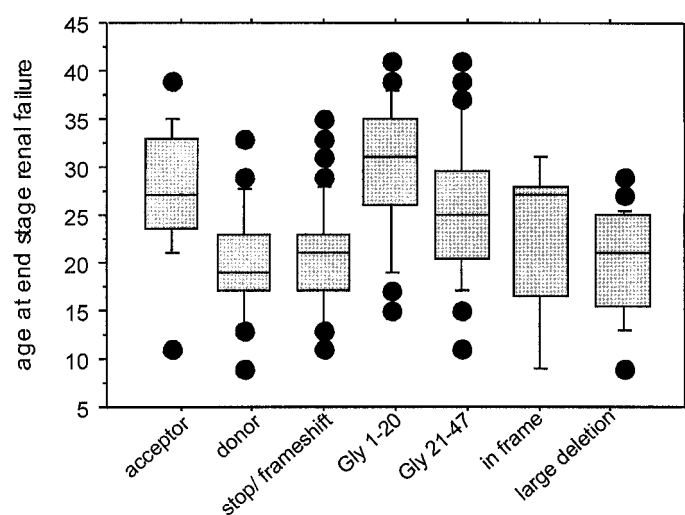

|                    | var | Coef   | Std. Error | Coef/SE | Chi-Square | P-Value       | Exp (Coef) |
|--------------------|-----|--------|------------|---------|------------|---------------|------------|
| type of mutation   | 7   | *      | *          | *       | 37.307     | <b>0.0001</b> | *          |
| (1) acceptor       | 1   | -1.358 | 0.406      | -3.349  | 11.217     | <b>0.008</b>  | 0.257      |
| (2) donor          | 1   | -0.318 | 0.376      | -0.847  | 0.718      | 0.3967        | 0.727      |
| (3) frameshift     | 1   | -0.494 | 0.341      | -1.448  | 2.097      | 0.1476        | 0.610      |
| (4) Gly 1-20       | 1   | -1.704 | 0.395      | -4.310  | 18.574     | <b>0.0001</b> | 0.182      |
| (5) Gly 21-47      | 1   | -1.279 | 0.359      | -3.564  | 12.704     | <b>0.0004</b> | 0.278      |
| (6) in frame       | 1   | -0.780 | 0.540      | -1.445  | 2.087      | 0.1485        | 0.458      |
| (7) lrg. rearrang. | 1   | -0.259 | 0.359      | -0.721  | 0.519      | 0.4711        | 0.772      |

**Fig. 2.** In 171 families data about the onset of end stage renal failure were available. Data were analysed by  $\chi^2$  tests and two-way ANOVA. Data were stratified according to the type of mutation as follows: (1) splice acceptor mutations; (2) splice donor mutations; (3) frameshift and premature stop mutations; (4) 5' glycine substitutions; (5) 3' glycine substitutions; (6) in-frame mutations; (7) and large rearrangements. The data were then analysed by Kaplan–Meier statistics (see Figure 3).

time point of onset of ESRF ( $n = 35$ ). All patients had developed ESRF within 4 years of the mean time point of ESRF of other affected family members (standard deviation,  $< 3$  years). In two families this was also true for all male Alport patients in three different generations.

## Discussion

In agreement with previous studies, the mode of inheritance of AS in German families was X-chromosomal in 85%, and autosomal recessive in about 15% of patients. A total of 9.5% of our patients had *de novo* mutations (11.3% in the literature). Mutations varied from single base exchanges to large rearrangements and were spread over the entire gene; no hot spot could be identified. The percentage of kidney biopsies done in all our patients, only our patients with known mutations or patients with mutations described in the literature was equal, being between 52 and 57%. This indicates that knowing the positive result of kidney biopsy did not lead to an inadequate pre-selection of patients for this analysis or previous studies.

The European study by Jais *et al.* [49] summarizes the data of 312 mutations based on research done

between 1994 and 1997. In contrast, the present study also includes publications after 1997 leaving only a minority of identical mutations being analysed in both studies. Additionally, more than 100 mutations from the US and Japan were included [5,12,23,26,31,33,34,36,37,40–44]. The previous study by Jais *et al.* [49] reports the genotype–phenotype correlation with regard to large rearrangements, missense, splicing and ‘small’ mutations, focusing on the differences between major rearrangements and small mutations. It does not distinguish between non-glycine and glycine-missense mutations as the most common form of mutation in AS. Furthermore, in contrast to all previous studies, the present one focuses on the effect of the location of small mutations within the  $\alpha 5(\text{IV})$ -chain on the phenotype in detail. As a new finding, different types of mutations and their locations on the COL4A5-gene, and therefore their predicted different effect on protein structure, were shown to be a significant predictor of the severity of disease.

The detection rate for mutations was 74% in the 41 patients, fulfilling the diagnostic criteria for AS [5,50], and 39% in all 104 German families. Therefore, our detection rate is in agreement with most previous studies, showing a rate above 50% in patients fulfilling three or all clinical criteria for AS [16]. Starting in 1991, numerous small children without renal failure

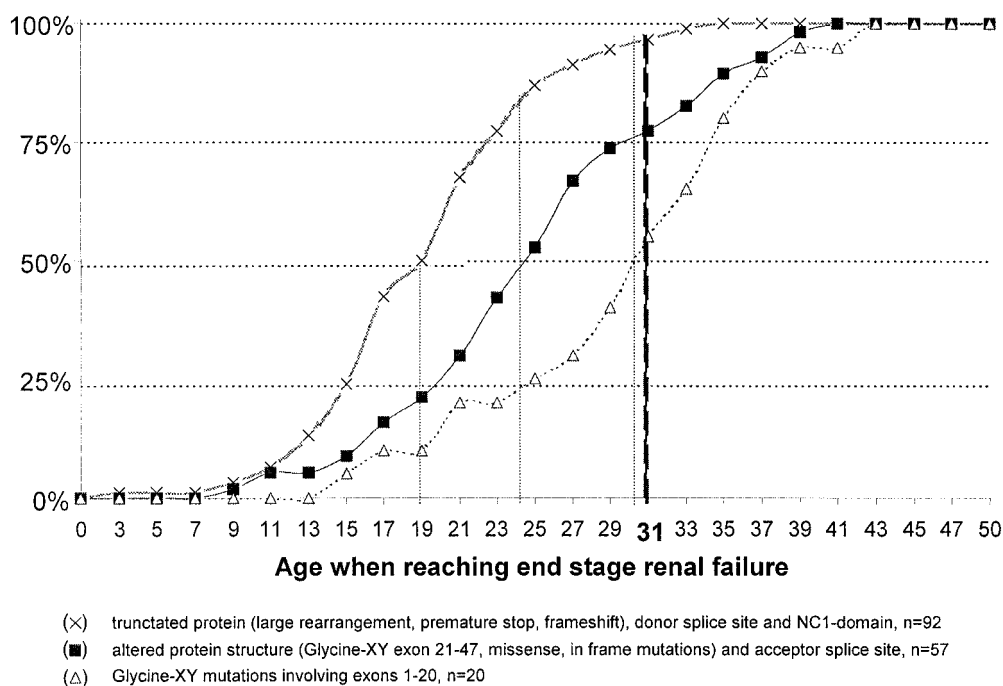

**Fig. 3.** Age when reaching ESRF in patients with identified mutations with altered protein structure and acceptor splice site mutations *vs* a truncated protein, donor splice site mutations and mutations involving the NC1-domain. Numbers of patients reaching ESRF differ significantly between 17 and 37 years of age ( $P=0.01$ ) as well as numbers of patients with adult type of AS (truncated protein, 7.5%, *vs* altered protein structure, 24.6%, *vs* glycine-XY mutations of exons 1–20, 45%;  $P=0.01$ ).

or renal biopsy were included in our study, explaining the high number of patients with little clinical data. However, it still remains an unsolved mystery as to why one is not able to find all the causative mutations. The inter-genic region between the COL4A5- and COL4A6-gene was not affected in 30 patients [51].

Around 8.7% of mutations in the German patients were large rearrangements. This percentage is smaller than in previous studies (up to 20%, Table 3). However, previous studies may have been biased toward large rearrangements, since small mutations are more time consuming and difficult to detect. Two different methods were used to screen for small mutations: direct sequencing and DGGE [48]. Sensitivity and specificity of DGGE used in exons 29–51 was evaluated by additional direct sequencing of exons 43/44 and 50 [48]. However, direct sequencing remains the gold standard in screening for small mutations, as shown previously [16].

Throughout recent history, including the family history and clinical screenings of all family members is still the gold standard for making the diagnosis of AS. Hearing loss and ocular changes might be more common in AS than previously thought [50]. A total of 39% of the German patients with mutations, and more than 40% of patients in the literature, had typical ocular changes. Therefore, consultation of specialists adds important information about extra-renal manifestations for making the exact diagnosis of AS. Screening for mutations in young patients with uncertain clinical data is a helpful and sensitive tool.

However, as a very large gene is to be screened for point mutations, newer techniques such as micro-arrays need to be developed for rapid molecular diagnosis.

The effect on protein expression was biochemically evaluated for very few mutations, and therefore only predictive data can be used to further analyse the effect of a specific mutation. Further studies based on RNA-analyses or immunohistochemical data of the skin with  $\alpha 5(\text{IV})$ -specific antibodies are to be used to discriminate between incorporation and non-incorporation. Immunohistochemistry has previously been shown to be a suitable diagnostic and prognostic tool in AS.

Premature stop-codons, frameshift mutations and large rearrangements are likely to result in a truncated (or absent) protein. They cause juvenile onset of ESRF, hearing loss and ocular changes in most patients (>92%, Table 3). Glycine-XY missense and in-frame mutations, however, less frequently result in the juvenile type of AS (73%). This difference is significant between 17 and 37 years of age. The mean age of onset of ESRF is 19.8 in the first group, 25.7 in the second and 30.1 in the third (Figure 3). Similar differences in hearing loss and ocular lesions make an artifact unlikely. Therefore, the impact of individual groups of mutations on the gene product must be different and result in a distinct phenotype.

Acceptor splice site mutations result in a significantly lower number of juvenile type cases of AS (63 *vs* 94%) and hearing loss than donor splice site mutations. The reason for this different phenotype remains

unclear without information on protein-expression and structure. Acceptor splice site mutations might cause a relatively ‘benign’ skipping of one exon more often. In contrast, donor splice site mutations might cause a premature stop more often, leading to a more severe change in the protein structure. Further studies need to be done, investigating the distinct gene-products, to elucidate this puzzling phenomenon.

Glycine-substitutions are likely to alter the folding of the triple helix of type IV collagen [52]. They cause juvenile type of AS less frequently. Interestingly, the distance of the same kind of mutation from the NC1-domain influences the time-point of onset of ESRF. This may be due to triple-helix formation starting at the NC1-domain and proceeding in a zipper-like feature to the N-terminus. Mutations in exon 1–20 may lead to a less critical disruption of this process. Similar observations have been made in osteogenesis imperfecta in type I collagen folding [52].

*De novo* glycine-XY mutations are less frequent than other *de novo* mutations (5.5 vs 13.9%). This is in contrast to the fact that glycine-XY substitutions are the most common mutation in AS (40%) [53]. The later onset of renal failure may increase the fitness of reproduction in these patients resulting in an evolutionary advantage. Therefore, glycine-XY mutations are transmitted to the next generation more often. This theoretical evolutionary advantage may no longer exist nowadays, because of the possibility of transplantation.

In summary, predicted major changes of protein structure nearly always cause early onset of ESRF. With some limitations, these data also correlate with severity and time of onset of extrarenal symptoms. These results might be of special interest in families without a known family history since *de novo* mutations and small numbers of male family members are common in X-linked hereditary diseases. For example, 50% of patients with a predicted truncated protein reach ESRF by the age of 19 and 75% do by 24 years of age. In contrast, only 26% of patients with an altered protein structure require dialysis at the same age and only 38% do by 24 years of age. The effect of glycine-substitutions on the phenotype depends on the distance of the mutation from the NC1-domain. *De novo* glycine mutations are less frequent than other *de novo* mutations. However, due to previous evolutionary advantage, glycine substitutions are the most common mutations.

According to our results, different types of mutations result in distinguishable Alport phenotypes. The consistence of the clinical phenotype was evaluated further in all German Alport families. Eight families had ocular changes and all 14 affected patients in two different generations had lenticonus. Twenty-one families reported hearing loss and all 38 patients in three different generations were affected. In 13 families with two or more Alport patients with ESRF ( $n=35$ ), all patients developed ESRF within 4 years of the mean time-point of ESRF of other affected family members (standard deviation, <3 years). In two

families this was also true for all patients in three different generations. Therefore, as can be expected, the intrafamilial standard deviation of the effect of the individual mutation is lower (<3 years) than the interfamilial standard deviation (6–7 years). It seems remarkable that, despite the improvement of overall health in humans during the last century, the phenotype of AS has not improved significantly in younger generations.

The distinction between the juvenile and adult types of AS from 1988 by Atkin *et al.* [54] does not reflect the new possibility for distinguishing phenotypes of X-chromosomal AS by knowing their genotypes. We suggest that the considerable prognostic relevance of the patients’ genotypes should be included in classification of the phenotype as follows.

- Type S (Severe)  
Genotype: large rearrangements, premature stop, frameshift, donor splice site and mutations involving the NC1-domain, 15% *de novo* mutations.  
Phenotype: ESRF ~20 years of age, 80% hearing loss, 40% ocular lesions.
- Type MS (Moderate–Severe)  
Genotype: non-glycine XY-missense, glycine-XY involving exon 21–47, in-frame and acceptor splice site mutations, 15% *de novo* mutations (5% *de novo* glycine-XY mutations).  
Phenotype: ESRF ~26 years of age, 65% hearing loss, 30% ocular lesions.
- Type M (Moderate)  
Genotype: glycine-XY mutations involving exon 1–20, 5% *de novo* mutations.  
Phenotype: ESRF ~30 years of age, 70% hearing loss, 30% ocular lesions.

**Acknowledgements.** This work was supported by a DFG grant to K.-O. Netzer (Ne 350/7-1), and by the SFB 263, C6 to M. Weber. Parts of this work were presented at the Annual Meetings of the American Society of Nephrology in 1995, 1996 and 1997, and of the European Renal Association in 2000. The authors wish to thank C. Merkl for her technical assistance and Dr Müller-Myhsok for his excellent help with the statistical analysis.

## References

1. Alport AC. Hereditary familial congenital haemorrhagic nephritis. *Br Med J* 1927; 1: 504–506
2. Flintner FA, Cameron JS, Chantler C, Houston I, Bobrow M. Genetics of classic Alport’s syndrome. *Lancet* 1988; ii: 1005–1007
3. Barker DF, Hostikka SL, Zhou J *et al.* Tryggvason K. Identification of mutations in the COL4A5 collagen gene in Alport syndrome. *Science* 1990; 247: 1224–1227
4. Hudson BG, Reenders ST, Tryggvason K. Type IV collagen: structure, gene organization and role in human diseases. *J Biol Chem* 268 (35): 26033–26036, 1993
5. Antignac C. Molecular genetics of basement membranes: the paradigm of Alport syndrome. *Kidney Int* 1995; 47 [Suppl 49]: 29–33
6. Netzer K-O, Renders L, Zhou J, Pullig O, Tryggvason K, Weber M. Deletions of the COL4A5 gene in patients with Alport syndrome. *Kidney Int* 1992; 42: 1336–1344



7. Heiskari N, Zhang X, Zhou J *et al.* Identification of 17 mutations in ten exons in the COL4A5 collagen gene, but no mutations found in four exons in COL4A6: a study of 250 patients with Alport syndrome. *J Am Soc Nephrol* 1996; 7: 702–709
8. Renieri A, Bruttini M, Galli L *et al.* X-linked Alport syndrome: an SSCP-based mutation survey over all 51 exons of the COL4A5 gene. *Am J Hum Genet* 1996; 58: 1192–1204
9. Boye E, Flinter F, Zhou J, Tryggvason K, Bobrow M, Harris A. Detection of 12 novel mutations in the collagenous domain of the COL4A5 gene in Alport syndrome patients. *Hum Mutat* 1995; 5: 197–204
10. Smeets HJM, Melenhorst JJ, Lemmink HH *et al.* Mutations in the COL4A5 collagen gene leading to different types of Alport syndrome. *Kidney Int* 1992; 42: 83–88
11. Lemmink HH, Schröder CH, Monnens LAH, Smeets HJM. The clinical spectrum of type IV collagen mutations. *Hum Mutat* 1997; 9: 477–499
12. Kawai S, Nomura S, Harano T, Harano K, Fukushima T, Osawa G. The COL4A5 gene in Japanese Alport patients. Spectrum of mutations of all exons. Japanese Alport Network. *Kidney Int* 1996; 49: 814–822
13. Knebelmann B, Breillat C, Forestier L *et al.* Spectrum of mutations in the COL4A5 collagen gene in X-linked Alport syndrome. *Am J Hum Genet* 1996; 59: 1221–1232
14. Neri TM, Zanelli P, De Palma G *et al.* Missense mutations in the COL4A5 gene in patients with X-linked Alport syndrome. *Hum Mutat* 1998; [Suppl 1]: S106–S109
15. Plant KE, Green PM, Vetrie D, Flinter FA. Detection of mutations in COL4A5 in patients with Alport syndrome. *Hum Mutat* 1999; 13: 124–132
16. Martin P, Heiskari N, Zhou J. High mutation detection rate in the COL4A5 collagen gene in suspected Alport syndrome using PCR and direct DNA sequencing. *J Am Soc Nephrol* 1998; 9: 2291–2301
17. Zhou J, Hertz JM, Tryggvason K. Mutation in the alpha 5(IV) collagen chain in juvenile-onset Alport syndrome without hearing loss or ocular lesions: detection by denaturing gradient gel electrophoresis of a PCR product. *Am J Hum Genetics* 1992; 50: 1291–1300
18. M'Rad R, Sanak M, Deschenes G *et al.* Alport syndrome: a genetic study of 31 families. *Hum Genet* 1992; 90: 420–426
19. Zhou J, Hertz JM, Leinonen A, Tryggvason K. Complete amino acid sequence of the human alpha 5(IV) collagen chain and identification of a single-base mutation in exon 23 converting glycine 521 in the collagenous domain to cysteine in an Alport syndrome patient. *J Biol Chem* 1992; 267: 12475–12481
20. Renieri A, Seri M, Myers JC *et al.* De novo mutation in the COL4A5 gene converting glycine 325 to glutamic acid in Alport syndrome. *Hum Mol Genet* 1992; 1: 127–129
21. Knebelmann B, Deschenes G, Gros F *et al.* Substitution of arginine for glycine 325 in the collagen alpha 5(IV) chain associated with X-linked Alport syndrome: characterization of the mutation by direct sequencing of PCR-amplified lymphoblast cDNA fragments. *Am J Hum Genet* 1992; 51: 135–142
22. Zhou J, Gregory MC, Hertz JM *et al.* Mutations in the codon for a conserved arginine-1563 in the COL4A5 collagen gene in Alport syndrome. *Kidney Int* 1993; 43: 722–729
23. Nomura S, Osawa G, Sai T, Harano T, Harano K. A splicing mutation in the alpha 5(IV) collagen gene of a family with Alport's syndrome. *Kidney Int* 1993; 43: 1116–1124
24. Lemmink HH, Schroeder CH, Brunner HG *et al.* Identification of four novel mutations in the COL4A5 gene of patients with Alport syndrome. *Genomics* 1993; 17: 485–489
25. Renieri A, Seri M, Galli L *et al.* Small frameshift deletions within the COL4A5 gene in juvenile-onset Alport syndrome. *Hum Genet* 1993; 92: 417–420
26. Nakazato H, Hattori S, Matsuura T, Koitabashi Y, Endo F, Matsuda I. Identification of a single base insertion in the COL4A5 gene in Alport syndrome. *Kidney Int* 1993; 44: 1091–1096
27. Guo C, Van Damme B, Van Damme-Lombaerts R, Van den Berghe H, Cassiman JJ, Marynen P. Differential splicing of COL4A5 mRNA in kidney and white blood cells: a complex mutation in the COL4A5 gene of an Alport patient deletes the NC1 domain. *Kidney Int* 1993; 44: 1316–1321
28. Lemmink HH, Kluijtmans LA, Brunner HG *et al.* Aberrant splicing of the COL4A5 gene in patients with Alport syndrome. *Hum Mol Genet* 1994; 3: 317–322
29. Peissel B, Rossetti S, Renieri A *et al.* A novel frameshift deletion in type IV collagen alpha 5 gene in a juvenile Alport syndrome patient: an adenine deletion (2940/2943 del A) in exon 34 of COL4A5. *Hum Mutat* 1994; 3: 386–390
30. Renieri A, Meroni M, Sessa A *et al.* Variability of clinical phenotype in a large Alport family with Gly 1143 Ser change of collagen alpha 5(IV)-chain. *Nephron* 1994; 67: 44–49
31. Ding J, Zhou J, Tryggvason K, Kashtan CE. COL4A5 deletions in three patients with Alport syndrome and posttransplant antiglomerular basement membrane nephritis. *J Am Soc Nephrol* 1994; 5: 161–168
32. Massella L, Rizzoni G, De Blasis R *et al.* De-novo COL4A5 gene mutations in Alport's syndrome. *Nephrol Dial Transplant* 1994; 9: 1408–1411
33. Nakazato H, Hattori S, Ushijima T *et al.* Mutations in the COL4A5 gene in Alport syndrome: a possible mutation in primordial germ cells. *Kidney Int* 1994; 46: 1307–1314
34. Guo C, Van Damme B, Vanrenterghem Y, Devriendt K, Cassiman JJ, Marynen P. Severe Alport phenotype in a woman with two missense mutations in the same COL4A5 gene and preponderant inactivation of the X chromosome carrying the normal allele. *J Clin Invest* 1995; 95: 1832–1837
35. Hertz JM, Heiskari N, Zhou J, Jensen UB, Tryggvason K. A nonsense mutation in the COL4A5 collagen gene in a family with X-linked juvenile Alport syndrome. *Kidney Int* 1995; 47: 327–332
36. Kitagawa K, Nakanishi K, Iijima K *et al.* Mutation in alpha 5(IV) collagen chain gene in nonfamilial hematuria. *J Am Soc Nephrol* 1995; 6: 264–268
37. Nakazato H, Hattori S, Ushijima T *et al.* Splicing mutations in the COL4A5 gene in Alport's syndrome: different mRNA expression between leukocytes and fibroblasts. *Am J Kidney Dis* 1995; 26: 732–739
38. Renieri A, Galli L, Grillo A *et al.* Major COL4A5 gene rearrangements in patients with juvenile Alport syndrome. *Am J Med Genet* 1995; 59: 380–385
39. Turco AE, Rossetti S, Biasi MO *et al.* A novel missense mutation in exon 3 of the COL4A5 gene associated with late-onset Alport syndrome. *Clin Genet* 1995; 48: 261–263
40. Barker DF, Pruchno CJ, Jiang X *et al.* A mutation causing Alport syndrome with tardive hearing loss is common in the western United States. *Am J Hum Genet* 1996; 58: 1157–1165
41. Naito I, Kawai S, Nomura S, Sado Y, Osawa G. Relationship between COL4A5 gene mutation and distribution of type IV collagen in male X-links Alport syndrome. Japanese Alport Network. *Kidney Int* 1996; 50: 304–311
42. Kawai S, Nomura S, Harano T *et al.* A single-base mutation in exon 31 converting glycine 852 to arginine in the collagenous domain in an Alport syndrome patient. *Nephron* 1996; 74: 333–336
43. Barker DF, Denison JC, Atkin CL, Gregory MC. Common ancestry of three Ashkenazi-American families with Alport syndrome and COL4A5 R1677Q. *Hum Genet* 1997; 99: 681–684
44. Ueki Y, Naito I, Ohashi T *et al.* Topoisomerase I and II consensus sequences in a 17-kb deletion junction of the COL4A5 and COL4A6 genes and immunohistochemical analysis of esophageal leiomyomatosis associated with Alport syndrome. *Am J Hum Genet* 1998; 62: 253–261
45. Mazzucco G, Barsotti P, Muda AO *et al.* Ultrastructural and immunohistochemical findings in Alport's syndrome: a study of 108 patients from 97 families with particular emphasis on COL4A5 gene mutation correlations. *J Am Soc Nephrol* 1998; 9: 1023–1031
46. Ermisch B, Gross O, Netzer K-O *et al.* Sporadic case of X-chromosomal Alport syndrome in a consanguineous family caused by a de novo mutation in the COL4A5 gene. *Pediatr Nephrol* 2000; 14: 758–761
47. Netzer KO, Pullig O, Frei U, Zhou J, Tryggvason K, Weber M. COL4A5 splice site mutation and  $\alpha 5(IV)$  collagen mRNA in Alport syndrome. *Kidney Int* 1993; 43: 486–492

48. Netzer K-O, Seibold S, Gross O, Lambrecht R, Weber M. Use of psoralen-coupled nucleotide primers for screening of COL4A5 mutations in Alport syndrome. *Kidney Int* 1996; 50: 1163–1367
49. Jais JP, Knebelmann B, Giatras I *et al.* X-linked Alport syndrome: natural history in 195 families and genotype–phenotype correlations in males. *J Am Soc Nephrol* 2000; 11: 649–657
50. Gross O, Merkel F, Seibold S, Weber M. Alport Syndrom und benigne familiäre Hämaturie: hereditäre Typ IV-Kollagen Erkrankungen. *Med Genetik* 2000; 12: 198–202
51. Lambrecht R, Gross O, Netzer KO, Seibold S, Weber M. Intergenic region between the collagen genes COL4A5 and COL4A6 is probably not affected in Alport Syndrome: a study with 110 families. *J Am Soc Nephrol* 1995; 6: 723, 1209 (abstract)
52. Raghunath M, Bruckner P, Steinmann B. Delayed triple helix formation of mutant collagen from patients with osteogenesis imperfecta. *J Mol Biol* 1994; 236: 940–949
53. Netzer K-O, Gross O, Jung C *et al.* Alport syndrome: clinical and genetic correlation in a type-IV collagen disease. In: Sessa A, Conte F, Meroni M, Battini G, eds. *Hereditary Kidney Diseases*, Berlyne GM, Giovannetti S, eds. *Contributions in Nephrology*. Karger, Basel, 1997; 122: 116–123
54. Atkin CL, Gregory MC, Border WA. Alport syndrome. In: Schrier RW, Gottschalk CW, eds. *Diseases of the Kidney*. Little, Brown and Co., Boston, 1988; 617–641

*Received for publication: 15.9.01*

*Accepted in revised form: 07.2.02*
